# Supplementary material
Source: PubMed Central journal article supplement (PMC4028388)

# Supplementary Figure 1

**A**

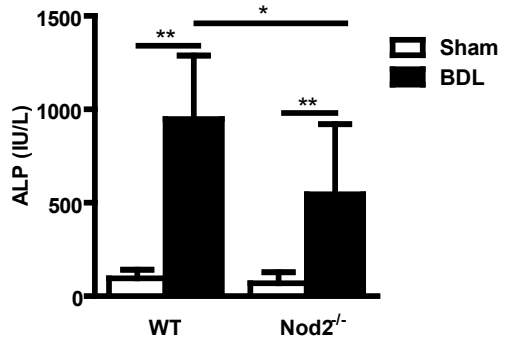

**B**

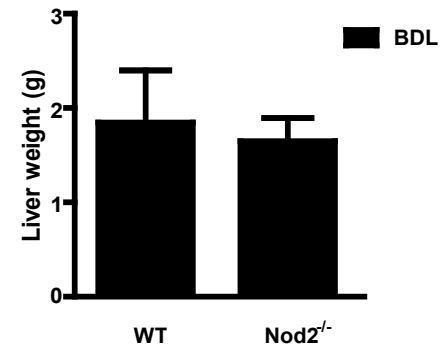

**C**

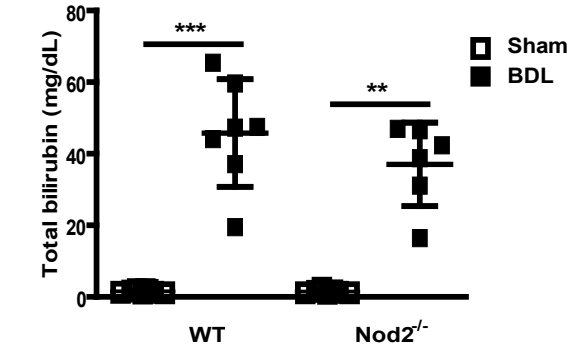

Supplement: NIHMS569773-supplement-01.pdf [file NIHMS569773-supplement-01.pdf]

# Supplementary Figure 2

**A**

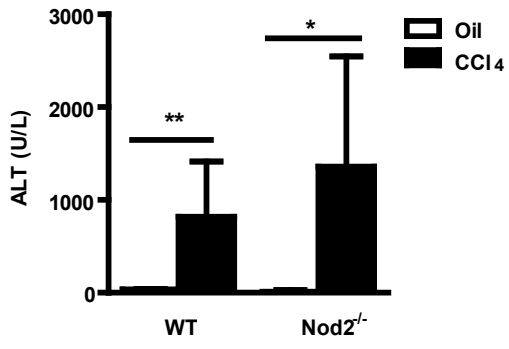

**B**

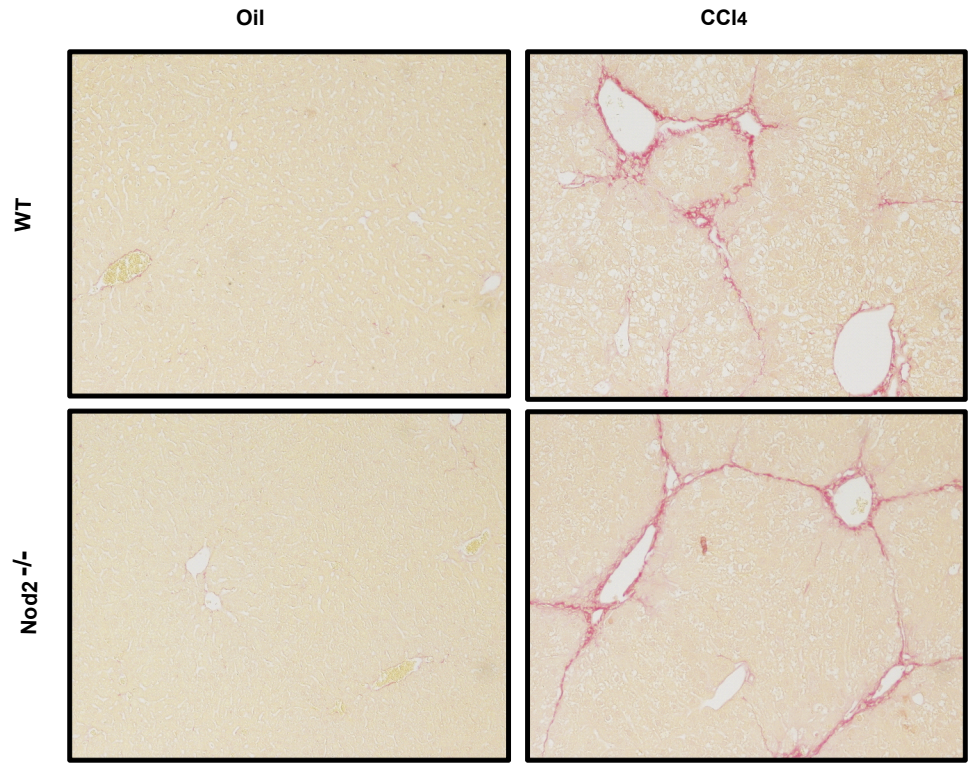

**C**

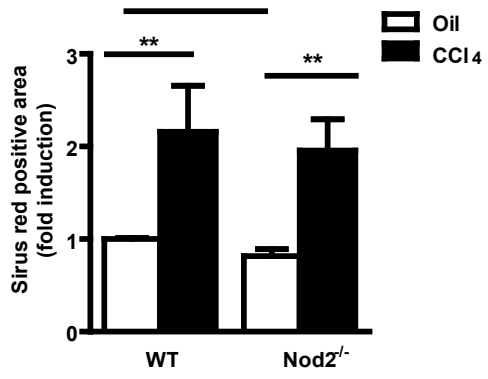

**D**

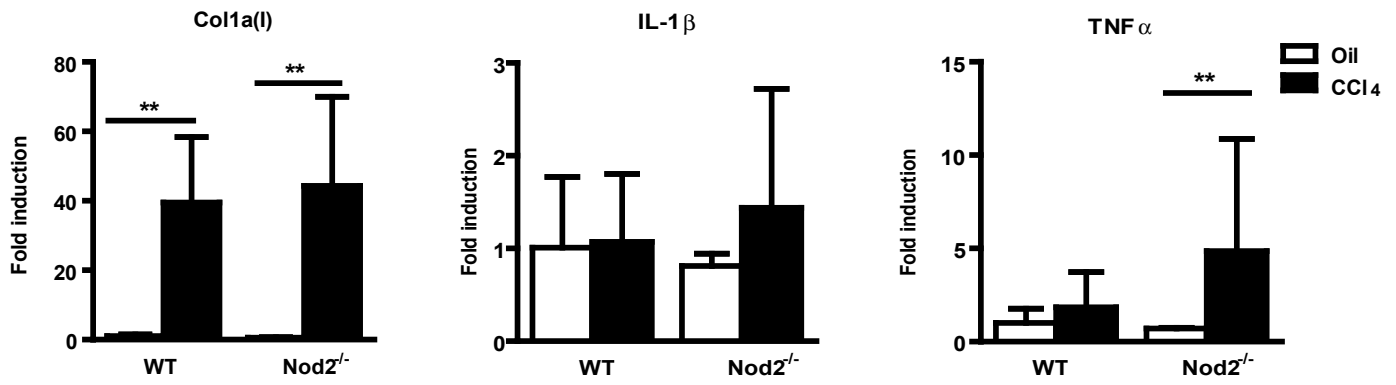

Supplement: NIHMS569773-supplement-02.pdf [file NIHMS569773-supplement-02.pdf]

# Supplementary Figure 3

**A**

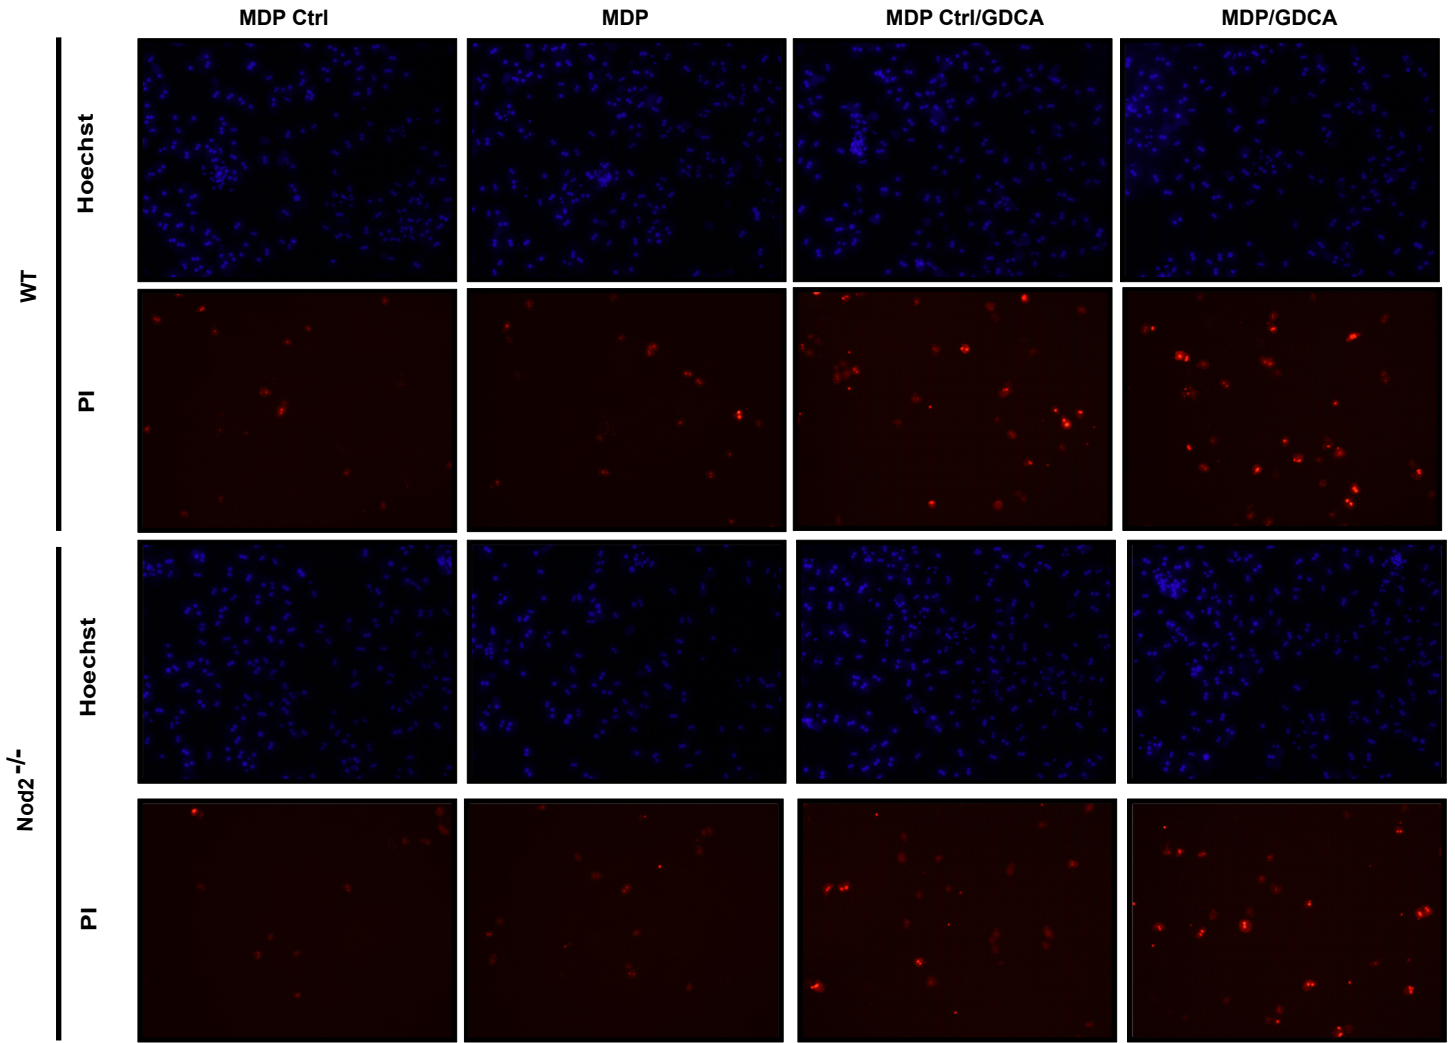

**B**

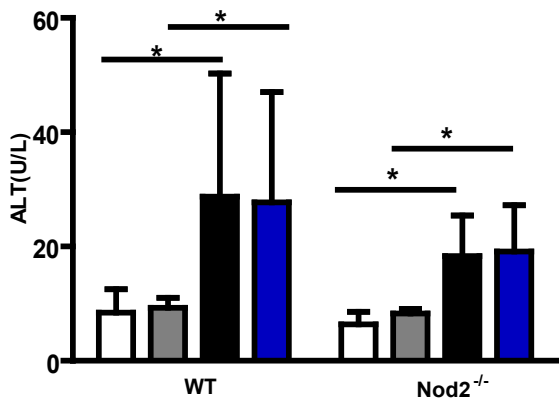

**C**

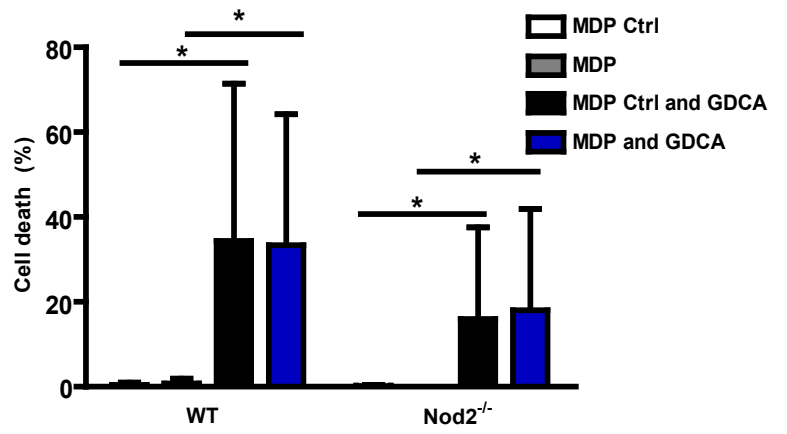

Supplement: NIHMS569773-supplement-03.pdf [file NIHMS569773-supplement-03.pdf]

# Supplementary Figure 4

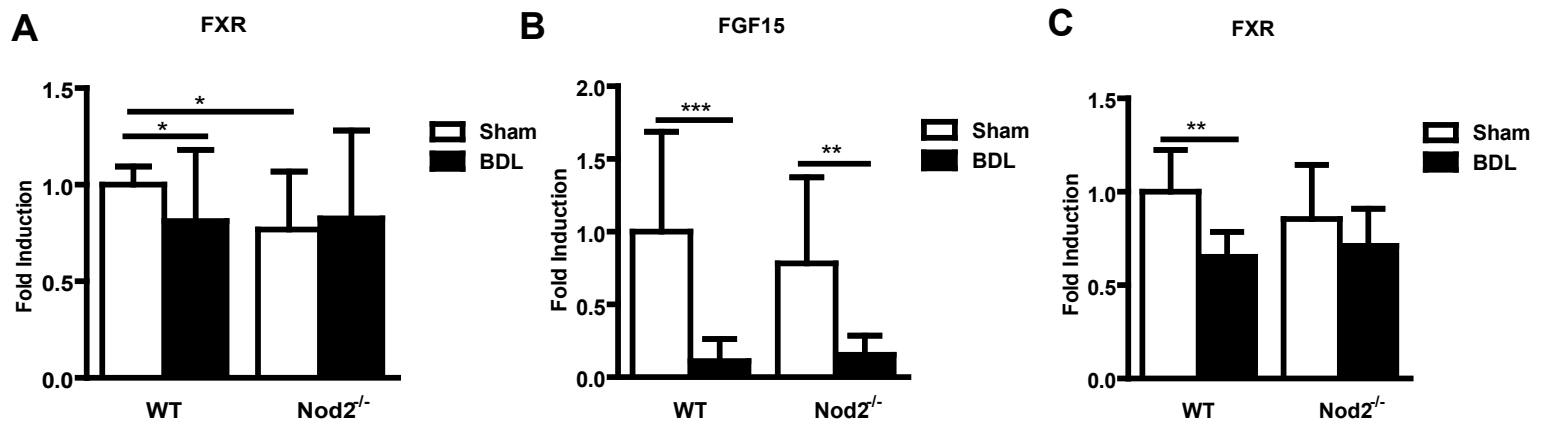

Supplement: NIHMS569773-supplement-04.pdf [file NIHMS569773-supplement-04.pdf]

# Supplementary Figure 5

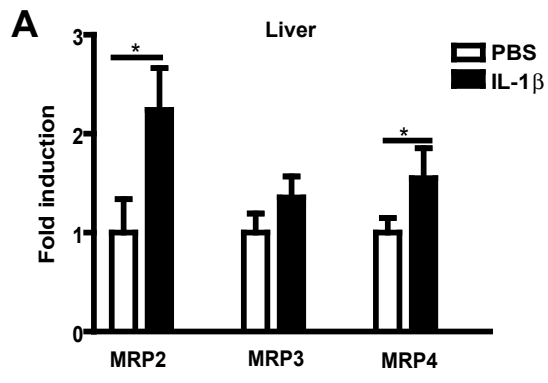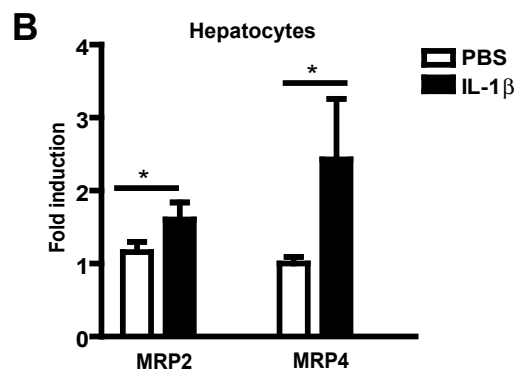

Supplement: NIHMS569773-supplement-05.pdf [file NIHMS569773-supplement-05.pdf]

# Supplementary Figure 6

**A**

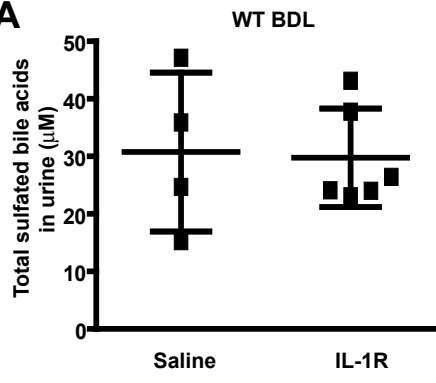

**B**

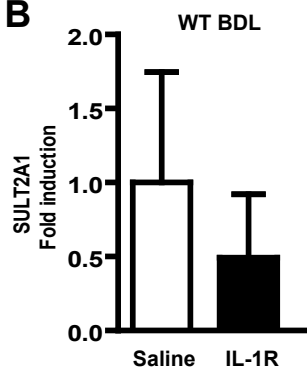

Supplement: NIHMS569773-supplement-06.pdf [file NIHMS569773-supplement-06.pdf]
